# Supplementary material for: Asteraceae Artemisia campestris and Artemisia herba-alba Essential Oils Trigger Apoptosis and Cell Cycle Arrest in Leishmania infantum Promastigotes
Source: Hindawi journal article supplement (doi:10.1155/2016/9147096), 2016-01-01
Supplement: f1 [file 9147096.f1.pdf]

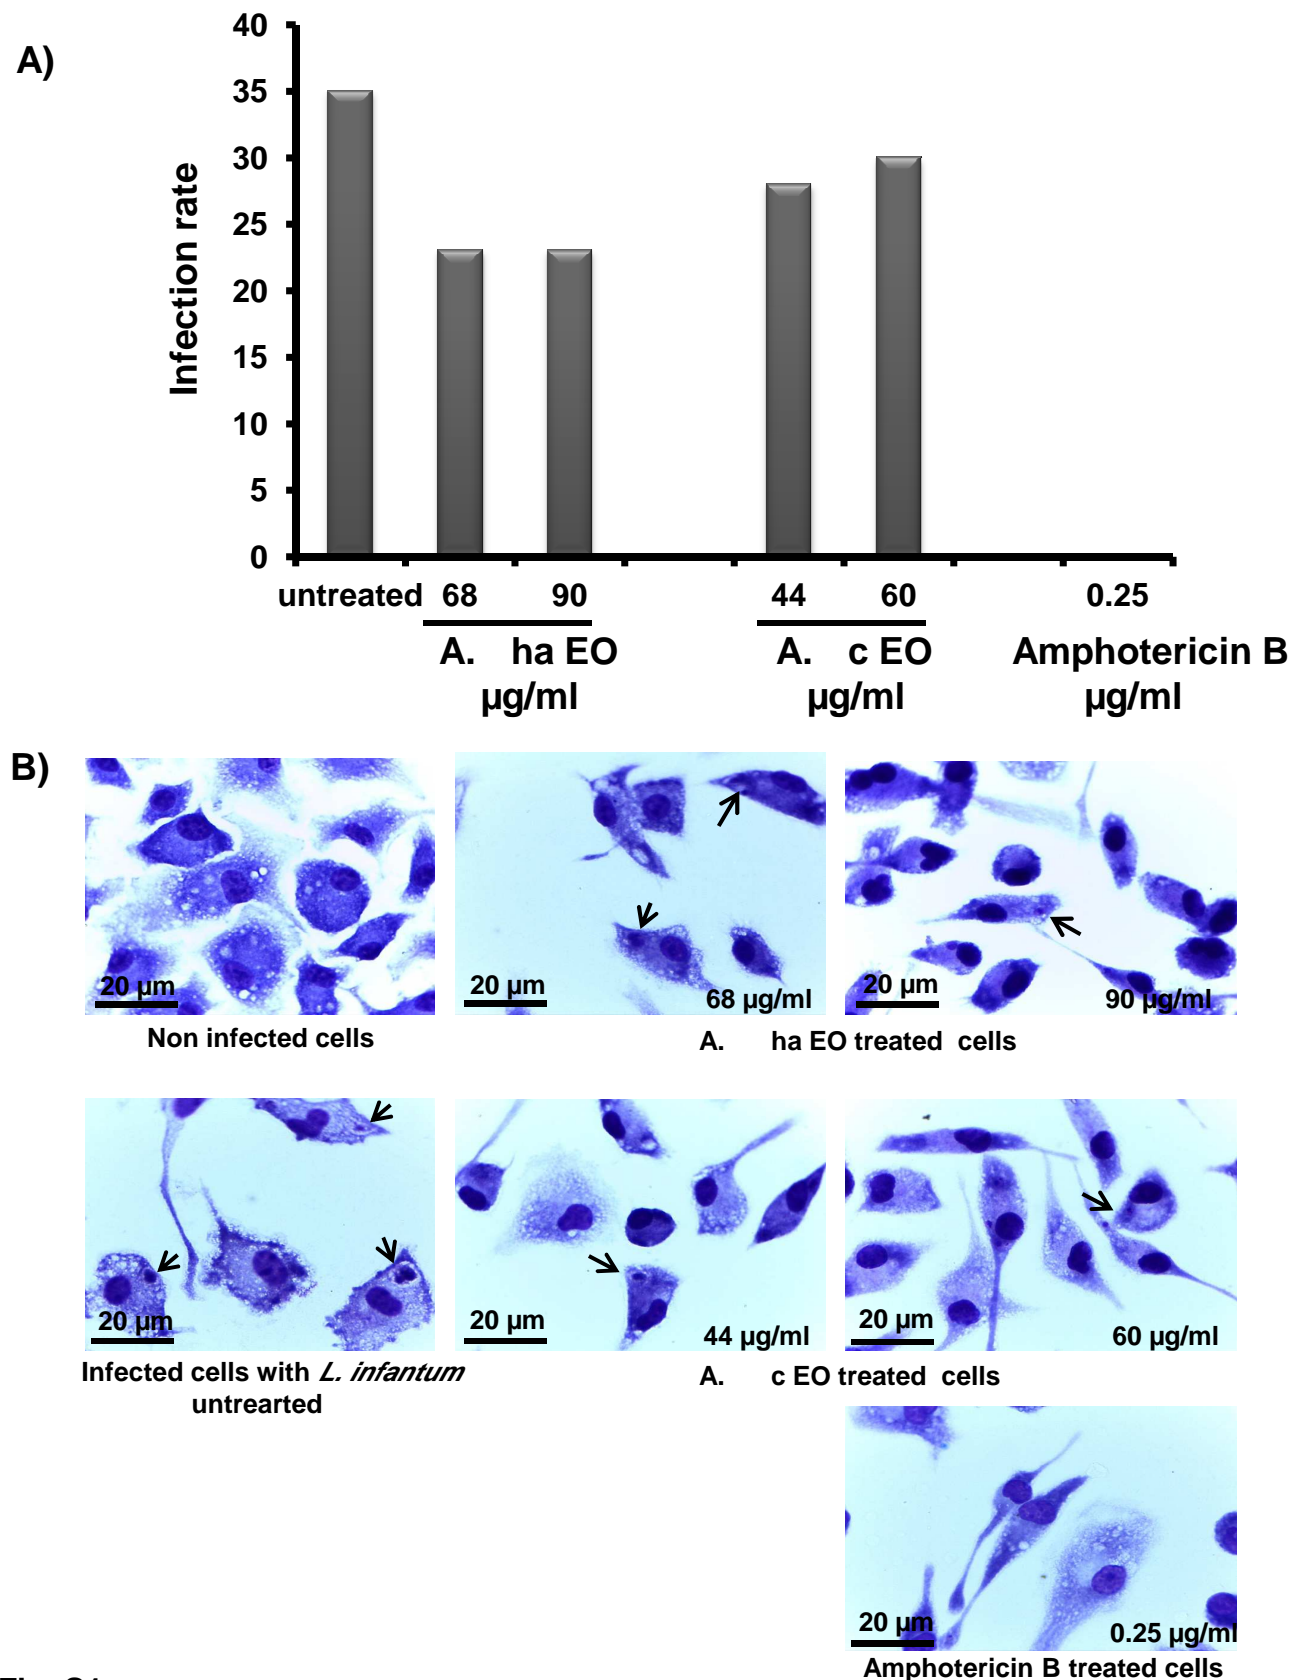

**Fig. S1:**

**A)** Effect of A. ha and A. c essential oils on mouse peritoneal macrophages Infected with *L. infantum* at a ratio of 1:10 (macrophage: parasites).

**B)** Light microscopy of Giemsa-stained cells observed at 100X after 24 h post-treatment. Arrows indicate vacuoles with intracellular amastigotes.

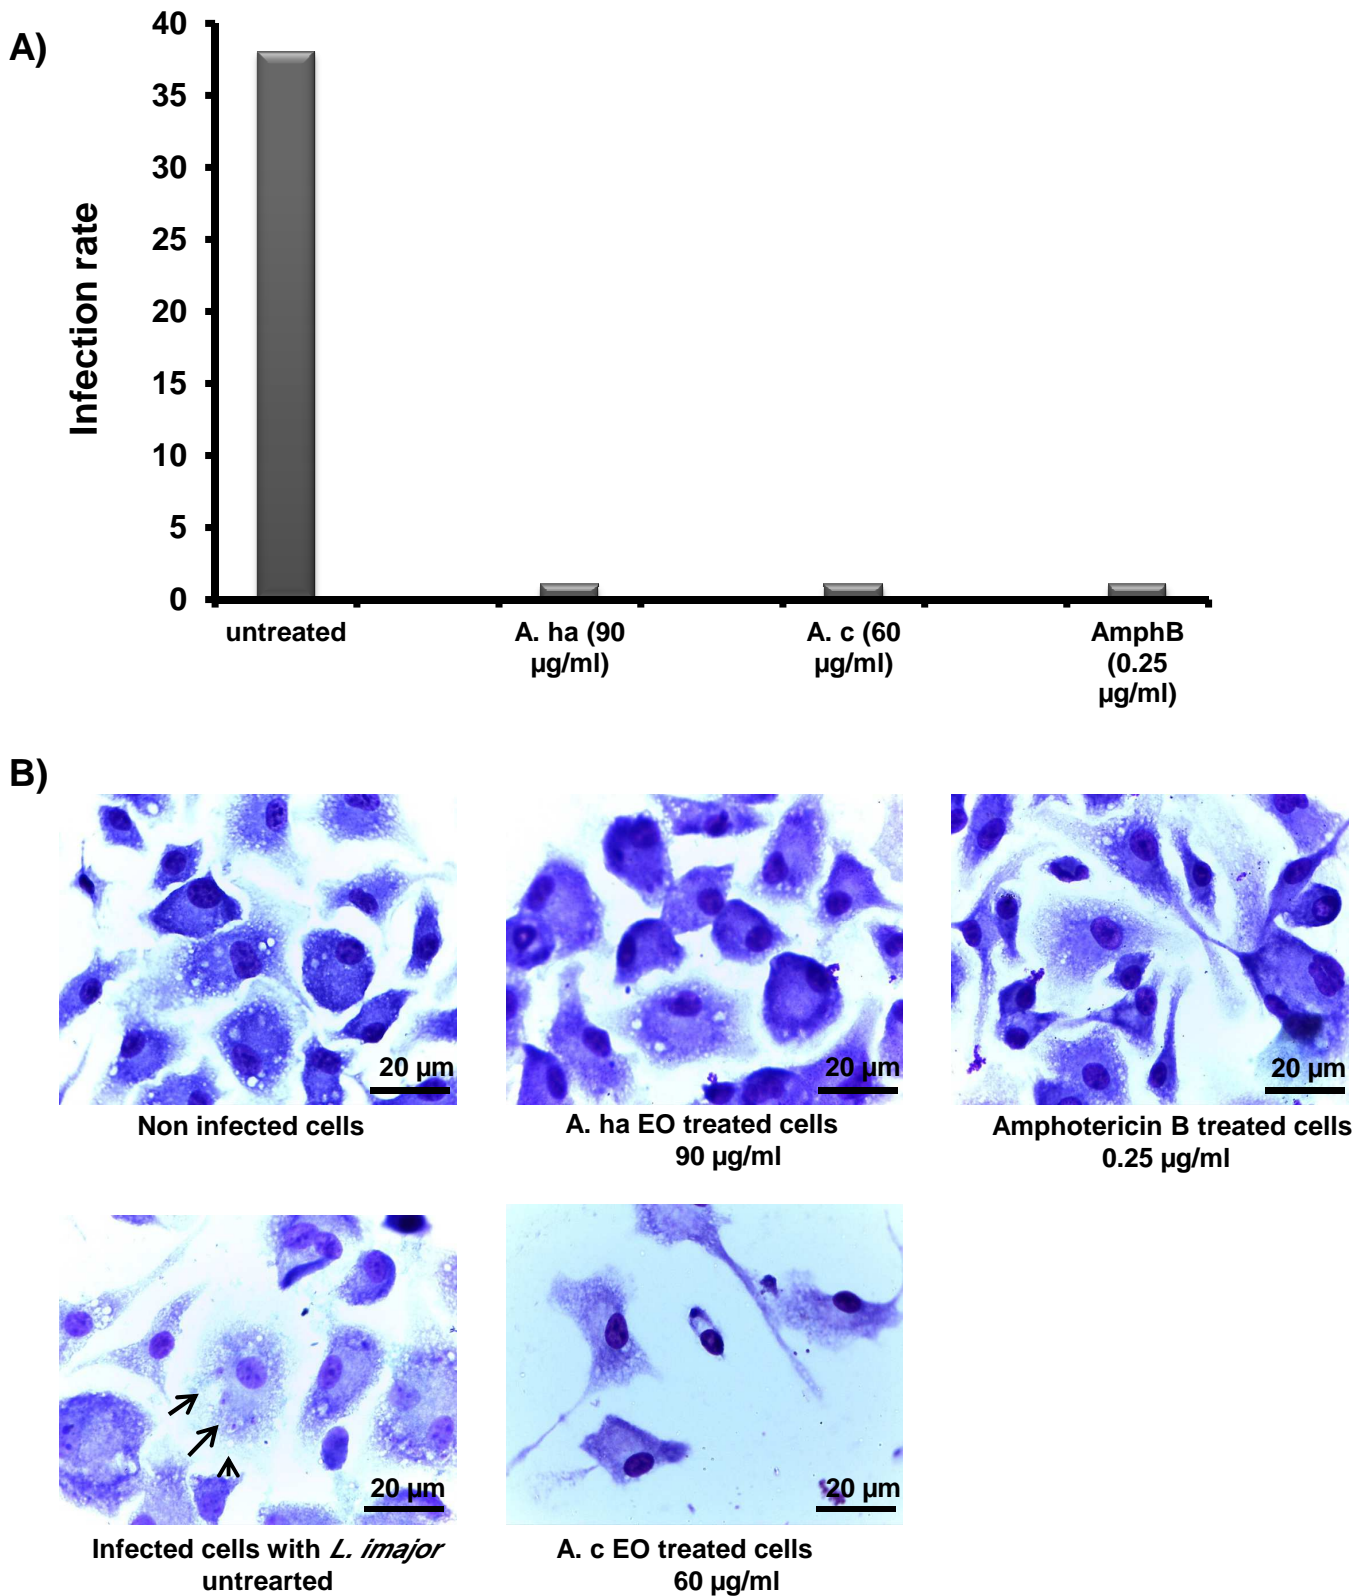

**Fig. S2: A)** Effect of *A. ha* and *A. c* essential oils on mouse peritoneal macrophages Infected with *L. major* at a ratio of 1:15 (macrophage: parasites).

**B)** Light microscopy of Giemsa-stained cells observed at 100 X magnification after 72 h post-treatment. Arrows indicate vacuoles with intracellular amastigotes. No remaining amastigotes in the EO-treated cells.
